# Supplementary material for: The Impact of an Intervention by a Mobile Geriatrics Team Including a Pharmacist on Potentially Inappropriate Drug Prescription: Results of the PharMoG Study
Source: Research Square preprint supplement (doi:10.21203/rs.3.rs-8221188/v1), 2026-01-12
Supplement: Supplementary file 1 [file 7a68a022e7cc73d7b1a09028.docx]

**Appendix 1** Flow chart of participant inclusion

**First COVID-19 lockdown:** suspension of inclusions

**Appendix 2** Distribution of patients according to number of drugs on initial prescription (N=127)

**Appendix 3** Main ATC classifications found on patients’ initial prescription at inclusion (N=127)

| ATC classification | ATC classification name | Number of lines of  prescription | Percentage  of lines of prescription |
| --- | --- | --- | --- |
| **B01A** | **ANTITHROMBOTICS** | **146** | **11%** |
| B01AC06 | ACETYLSALICYLIC ACID | 49 | 34% |
| B01AB05 | ENOXAPARIN | 26 | 18% |
| B01AF02 | APIXABAN | 24 | 16% |
| B01AA03 | WARFARIN | 12 | 8% |
| B01AC04 | CLOPIDOGREL | 11 | 8% |
| B01AB01 | HEPARIN | 9 | 6% |
| B01AA12 | FLUINDIONE | 5 | 3% |
| B01AF01 | RIVAROXABAN | 5 | 3% |
| B01AB10 | TINZAPARIN | 3 | 2% |
| B01AE07 | DABIGATRAN ETEXILATE | 1 | 1% |
| B01AC24 | TICAGRELOR | 1 | 1% |
| **N02B** | **OTHER ANALGESICS AND ANTIPYRETICS** | **77** | **6%** |
| N02BE01 | PARACETAMOL | 62 | 81% |
| N02BG06 | NEFOPAM | 6 | 8% |
| N02BE51 | PARACETAMOL IN COMBINATION EXCEPT WITH PSYCHOLEPTICS | 5 | 6% |
| N02BE71 | PARACETAMOL IN COMBINATION WITH PSYCHOLEPTICS | 3 | 4% |
| N02BA01 | ACETYLSALICYLIC ACID | 1 | 1% |
| **C03C** | **LOOP DIURETICS** | **71** | **5%** |
| C03CA01 | FUROSEMIDE | 71 | 100% |
| **A02B** | **DRUGS FOR GASTRODUODENAL ULCERS AND GASTRO-OESOPHAGEAL REFLUX** | **65** | **5%** |
| A02BC02 | PANTOPRAZOLE | 46 | 71% |
| A02BC03 | LANSOPRAZOLE | 11 | 17% |
| A02BC05 | ESOMEPRAZOLE | 6 | 9% |
| A02BC01 | OMEPRAZOLE | 1 | 2% |
| A02BA01 | CIMETIDINE | 1 | 2% |
| **A06A** | **DRUGS FOR CONSTIPATION** | **62** | **5%** |
| A06AD65 | MACROGOL IN COMBINATION | 35 | 56% |
| A06AG20 | COMBINATIONS | 11 | 18% |
| A06AX02 | MEDICINES PRODUCING CARBON DIOXIDE | 7 | 11% |
| A06AA01 | PARAFFIN OIL | 4 | 6% |
| A06AG07 | SORBITOL | 2 | 3% |
| A06AD15 | MACROGOL | 1 | 2% |
| A06AA51 | PARAFFIN OIL IN COMBINATION | 1 | 2% |
| A06AH03 | NALOXEGOL | 1 | 2% |
| **C10A** | **NON-COMBINED LIPID-MODIFYING AGENTS** | **60** | **5%** |
| C10AA05 | ATORVASTATIN | 34 | 53% |
| C10AA03 | PRAVASTATIN | 7 | 11% |
| C10AA07 | ROSUVASTATIN | 6 | 9% |
| C10AA01 | SIMVASTATIN | 5 | 8% |
| C10AB05 | FENOFIBRATE | 5 | 8% |
| C10AX09 | EZETIMIBE | 2 | 3% |
| C10AC01 | COLESTYRAMINE | 1 | 2% |

**Appendix 4** Main ATC classifications concerned for each type of intervention carried out (N=127)

| Pharmaceutical intervention |  | Number of lines of prescriptions | Percentage of lines of prescriptions |
| --- | --- | --- | --- |
| **Discontinuation** |  | **215** | **33.7%** |
| A02B | DRUGS FOR GASTRODUODENAL ULCERS AND GASTRO-OESOPHAGEAL REFLUX | 26 | 12.1% |
| N02A | OPIOIDS | 16 | 7.4% |
| C10A | NON-COMBINED LIPID-MODIFYING AGENTS | 16 | 7.4% |
| N06A | ANTIDEPRESSANTS | 13 | 6.0% |
| N02B | OTHER ANALGESICS AND ANTIPYRETICS | 12 | 5.6% |
| **Therapeutic follow-up** |  | **121** | **19.0%** |
| C03C | LOOP DIURETICS | 12 | 9.9% |
| C10A | NON-COMBINED LIPID-MODIFYING AGENTS | 11 | 9.1% |
| H03A | THYROID PREPARATIONS | 11 | 9.1% |
| C01B | CLASSES I AND III ANTIARRHYTHMIC DRUGS | 7 | 5.8% |
| B01A | ANTITHROMBOTICS | 6 | 5.0% |
| **Dosage adjustment** |  | **112** | **17.6%** |
| A06A | DRUGS FOR CONSTIPATION | 17 | 15.2% |
| N02B | OTHER ANALGESICS AND ANTIPYRETICS | 14 | 12.5% |
| A02B | DRUGS FOR GASTRODUODENAL ULCERS AND GASTRO-OESOPHAGEAL REFLUX | 11 | 9.8% |
| B01A | ANTITHROMBOTICS | 10 | 8.9% |
| A10A | INSULINS AND ANALOGUES | 8 | 7.1% |
| **Supplement*** |  | **105** | **16.5%** |
| A06A | DRUGS FOR CONSTIPATION | 45 | 42.9% |
| N05B | ANXIOLYTICS | 23 | 21.9% |
| N02B | OTHER ANALGESICS AND ANTIPYRETICS | 17 | 16.2% |
| N02A | OPIOIDS | 13 | 12.4% |
| N06A | ANTIDEPRESSANTS | 7 | 6.7% |
| **Substitution / replacement** |  | **63** | **9.9%** |
| N05B | ANXIOLYTICS | 12 | 19.0% |
| N06A | ANTIDEPRESSANTS | 11 | 17.5% |
| N02A | OPIOIDS | 8 | 12.7% |
| B01A | ANTITHROMBOTICS | 5 | 7.9% |
| A06A | DRUGS FOR CONSTIPATION | 5 | 7.9% |
| **Optimisation of administration methods** |  | **22** | **3.4%** |
| N02B | OTHER ANALGESICS AND ANTIPYRETICS | 4 | 18.2% |
| B03A | MARTIAL PREPARATIONS | 3 | 13.6% |
| R03A | ADRENERGICS FOR INHALATION | 3 | 13.6% |
| N06A | ANTIDEPRESSANTS | 3 | 13.6% |
| N03A | ANTIEPILEPTICS | 1 | 4.5% |

** Except for vitamin D deficiency and vaccinations*

**Appendix 5** Evolution of the outcome of the therapeutic optimisation proposals related to PIDPs (n=70)

|  |  | **3 months after discharge from hospital** | | | | |
| --- | --- | --- | --- | --- | --- | --- |
| **At discharge from hospital** | **Outcome of proposals** | Accepted | Not accepted | Not applicable | Not given | **Overall total** |
| Accepted | 68 | 6 | 29 | 1 | **104 (29.7%)** |
| Not accepted | 11 | 30 | 12 | 2 | **55**  **(15.7%)** |
| Not applicable | 41 | 66 | 9 | 42 | **158 (45.1%)** |
| Not given | 4 | 4 | 16 | 9 | **33**  **(9.4%)** |
| **Overall total** | **124 (35.4%)** | **106 (30.3%)** | **66**  **(18.9%)** | **54**  **(15.4%)** | **350**  **(100%)** |

**Appendix 6** Satisfaction of the physicians in the PharMoG team (N=3)

| **Questions** | Physician EMG  1 | Physician EMG  2 | Physician EMG  3 |
| --- | --- | --- | --- |
| Overall, how satisfied are you with your experience in the MGT with a pharmacist? | Very satisfied | Generally satisfied | Very satisfied |
| Do you consider it RELEVANT for the pharmacist to propose a comprehensive treatment optimization for patients managed by the MGT? | Relevant | Not very relevant | Très Relevant |
| Regarding the content of the interventions, what do you think of the optimizations carried out by the pharmacist for the patients you manage in the MGT? | Very satisfied | Very satisfied | Very satisfied |
| Regarding the format of the “pharmacy report", what do you think of the optimizations carried out by the pharmacist for the patients you manage in the MGT? | Very satisfied | Very satisfied | Very satisfied |
| **In your opinion, what is the benefit of the pharmacist’s intervention for the MGT ?** |  |  |  |
| - Time-saving for the EMG physician (thanks to medication reconciliation, data collection, etc.) | Agree | Agree | Strongly agree |
| - Complementary perspective on therapy | Strongly agree | Agree | Agree |
| - Benefit for the patient | Strongly agree | Agree | Strongly agree |
| **In your opinion, does the pharmacist’s intervention help support the recommendations made by the MGT physicians to** |  |  |  |
| - Hospital physicians | Agree | Disagree | Disagree |
| - General practitioners | Agree | Disagree | Agree |
| - Community pharmacists | Strongly agree | Agree | Strongly agree |
| **Do you think the presence of a pharmacist within the EMG should be:** |  |  |  |
| - Systematic | Disagree | Disagree | Disagree |
| - On request/by the MGT | Agree | Agree | Agree |
| - Via tele-expertise | Strongly agree | Agree | Strongly agree |
| - In person | Agree | Agree | No opinion |
| **Overall, do you think the integration of the pharmacist within your MGT has been successful?** | Strongly agree | Agree | Strongly agree |
